# Supplementary material
Source: PubMed Central journal article supplement (PMC7218425)
Supplement: advancesADV2020001499-suppl1.pdf [file advancesADV2020001499-suppl1.pdf]

**Supplemental Table 1a.** Impact of conditioning intensity on HCT outcomes

|                                     | MAC              |                |         | RIC              |                |         |
|-------------------------------------|------------------|----------------|---------|------------------|----------------|---------|
|                                     | Haplo<br>(N=358) | MUD<br>(N=716) | p value | Haplo<br>(N=129) | MUD<br>(N=258) | p value |
| <b>Age at transplant, years</b>     |                  |                | 0.99    |                  |                | <0.0001 |
| Median (Range)                      | 32 (18-68)       | 32 (18-71)     |         | 39 (18-73)       | 53 (18-76)     |         |
| Interquartile range                 | 23, 44           | 24, 43         |         | 26, 54           | 36, 61         |         |
| <30                                 | 166 (46%)        | 326 (46%)      | 0.60    | 42 (33%)         | 45 (17%)       | <0.0001 |
| 30-39                               | 74 (21%)         | 155 (22%)      |         | 24 (19%)         | 28 (11%)       |         |
| 40-54                               | 79 (22%)         | 173 (24%)      |         | 32 (25%)         | 66 (26%)       |         |
| ≥55                                 | 39 (11%)         | 62 (9%)        |         | 31 (24%)         | 119 (46%)      |         |
| <b>Recipient sex</b>                |                  |                | 1.0     |                  |                | 1.0     |
| Male                                | 231 (65%)        | 462 (65%)      |         | 72 (56%)         | 144 (56%)      |         |
| Female                              | 127 (35%)        | 254 (35%)      |         | 57 (44%)         | 114 (44%)      |         |
| <b>KPS</b>                          |                  |                | 0.0001  |                  |                | 0.37    |
| 90-100                              | 237 (66%)        | 495 (69%)      |         | 84 (65%)         | 162 (63%)      |         |
| ≤80                                 | 109 (30%)        | 155 (22%)      |         | 42 (33%)         | 82 (32%)       |         |
| NA                                  | 12 (3%)          | 66 (9%)        |         | 3 (2%)           | 14 (5%)        |         |
| <b>Cytogenetic risk</b>             |                  |                | 1.0     |                  |                | 1.0     |
| Poor risk                           | 114 (32%)        | 228 (32%)      |         | 49 (38%)         | 98 (38%)       |         |
| Not poor                            | 244 (68%)        | 488 (68%)      |         | 80 (62%)         | 160 (62%)      |         |
| <b>Ph (+) status</b>                |                  |                | 1.0     |                  |                | 1.0     |
| Ph+                                 | 81 (23%)         | 162 (23%)      |         | 36 (28%)         | 72 (28%)       |         |
| Ph-                                 | 277 (77%)        | 554 (77%)      |         | 93 (72%)         | 186 (72%)      |         |
| <b>Disease stage prior to HCT</b>   |                  |                | 1.0     |                  |                | 1.0     |
| CR1                                 | 195 (54%)        | 390 (54%)      |         | 61 (47%)         | 122 (47%)      |         |
| CR2+                                | 110 (31%)        | 220 (31%)      |         | 46 (36%)         | 92 (36%)       |         |
| Active disease                      | 53 (15%)         | 106 (15%)      |         | 22 (17%)         | 44 (17%)       |         |
| <b>ALL type</b>                     |                  |                | 0.73    |                  |                | 0.57    |
| B-ALL                               | 251 (70%)        | 499 (70%)      |         | 94 (73%)         | 200 (78%)      |         |
| T-ALL                               | 86 (24%)         | 166 (23%)      |         | 27 (21%)         | 43 (17%)       |         |
| Other                               | 21 (6%)          | 51 (7%)        |         | 8 (6%)           | 15 (6%)        |         |
| <b>From diagnosis to transplant</b> |                  |                | 0.077   |                  |                | 0.30    |
| ≤6 months                           | 90 (25%)         | 220 (31%)      |         | 24 (19%)         | 64 (25%)       |         |
| >6-12 months                        | 126 (35%)        | 256 (36%)      |         | 42 (33%)         | 86 (33%)       |         |
| >12 months                          | 142 (40%)        | 240 (34%)      |         | 63 (49%)         | 108 (42%)      |         |
| <b>HCT Comorbidity Index</b>        |                  |                | <0.0001 |                  |                | <0.0001 |
| 0                                   | 76 (21%)         | 40 (6%)        |         | 22 (17%)         | 9 (3%)         |         |
| 1-2                                 | 56 (16%)         | 12 (2%)        |         | 15 (12%)         | 9 (3%)         |         |
| >2                                  | 39 (11%)         | 6 (1%)         |         | 43 (33%)         | 6 (2%)         |         |
| NA                                  | 187 (52%)        | 658 (92%)      |         | 49 (38%)         | 234 (91%)      |         |
| <b>Donor age, years</b>             | N=328            | N=331          | <0.0001 | N=122            | N=131          | 0.004   |
| Median (Range)                      | 38 (13-74)       | 32 (18-57)     |         | 37 (15-76)       | 31 (19-62)     |         |
| Interquartile range                 | 26, 50           | 26, 40         |         | 26, 47           | 24, 40         |         |
| <30                                 | 105 (29%)        | 132 (18%)      | <0.0001 | 41 (32%)         | 64 (25%)       | <0.0001 |
| 30-50                               | 142 (40%)        | 181 (25%)      |         | 58 (45%)         | 62 (24%)       |         |
| ≥50                                 | 81 (23%)         | 18 (3%)        |         | 23 (18%)         | 5 (2%)         |         |
| NA                                  | 30 (8%)          | 385 (54%)      |         | 7 (5%)           | 127 (49%)      |         |
| <b>Donor sex</b>                    |                  |                | <0.0001 |                  |                | 0.034   |
| Male                                | 196 (55%)        | 505 (71%)      |         | 80 (62%)         | 185 (72%)      |         |
| Female                              | 162 (45%)        | 188 (26%)      |         | 49 (38%)         | 69 (27%)       |         |
| NA                                  |                  | 23 (3%)        |         |                  | 4 (2%)         |         |

**Supplemental Table 1a.** Impact of conditioning intensity on HCT outcomes

|                                       | MAC              |                |         | RIC              |                |         |
|---------------------------------------|------------------|----------------|---------|------------------|----------------|---------|
|                                       | Haplo<br>(N=358) | MUD<br>(N=716) | p value | Haplo<br>(N=129) | MUD<br>(N=258) | p value |
| <b>Female donor to male recipient</b> |                  |                | <0.0001 |                  |                | 0.054   |
| Yes                                   | 105 (29%)        | 99 (14%)       |         | 26 (20%)         | 32 (12%)       |         |
| No                                    | 253 (71%)        | 594 (83%)      |         | 103 (80%)        | 222 (86%)      |         |
| NA                                    |                  | 23 (3%)        |         | 0 (0%)           | 4 (2%)         |         |
| <b>Donor/Recipient CMV serostatus</b> |                  |                | <0.0001 |                  |                | <0.0001 |
| D-/R-                                 | 31 (9%)          | 217 (30%)      |         | 12 (9%)          | 58 (22%)       |         |
| D-/R+                                 | 58 (16%)         | 197 (28%)      |         | 26 (20%)         | 85 (33%)       |         |
| D+/R-                                 | 28 (8%)          | 71 (10%)       |         | 13 (10%)         | 18 (7%)        |         |
| D+/R+                                 | 227 (63%)        | 197 (28%)      |         | 76 (59%)         | 81 (31%)       |         |
| Unknown                               | 14 (4%)          | 34 (5%)        |         | 2 (2%)           | 16 (6%)        |         |
| <b>Conditioning intensity</b>         |                  |                | <0.0001 |                  |                |         |
| TBI-based                             | 173 (49%)        | 535 (75%)      |         |                  |                |         |
| Not TBI-based                         | 183 (51%)        | 176 (25%)      |         |                  |                |         |
| <b>Stem cell source</b>               |                  |                | <0.0001 |                  |                | <0.0001 |
| BM                                    | 180 (50%)        | 152 (21%)      |         | 57 (44%)         | 16 (6%)        |         |
| PB                                    | 178 (50%)        | 564 (79%)      |         | 72 (56%)         | 242 (94%)      |         |
| <b>GvHD prophylaxis</b>               |                  |                |         |                  |                |         |
| Sirolimus-based                       |                  | 13 (2%)        |         |                  | 10 (4%)        |         |
| MTX-based                             |                  | 576 (80%)      |         |                  | 88 (34%)       |         |
| CellCept-based                        |                  | 127 (18%)      |         |                  | 160 (62%)      |         |
| PTCy/CellCept/CNI                     | 358 (100%)       |                |         | 129 (100%)       |                |         |
| ATG added                             | 0                | 463 (65%)      |         | 0                | 163 (63%)      |         |
| <b>Transplant period</b>              |                  |                | <0.0001 |                  |                | <0.0001 |
| 2005-2012                             | 58 (16%)         | 477 (67%)      |         | 28 (22%)         | 132 (51%)      |         |
| 2013-2018                             | 300 (84%)        | 239 (33%)      |         | 101 (78%)        | 126 (49%)      |         |

**Supplemental Table 1b.** Conditioning regimen

|                             | Haplo<br>(N=487) | MUD<br>(N=974) | Total<br>(N=1461) |
|-----------------------------|------------------|----------------|-------------------|
| <b>Conditioning regimen</b> |                  |                |                   |
| TBI based MAC               | 173 (36%)        | 535 (55%)      | 708 (48%)         |
| FluBu MAC                   | 162 (33%)        | 47 (5%)        | 209 (14%)         |
| FluTreo MAC                 | 4 (1%)           | 18 (2%)        | 22 (2%)           |
| FluBu RIC                   | 21 (4%)          | 107 (11%)      | 128 (9%)          |
| FluMel                      | 28 (6%)          | 0 (0%)         | 28 (2%)           |
| FluTBI RIC                  | 85 (17%)         | 63 (6%)        | 148 (10%)         |
| FluTreo RIC                 | 3 (1%)           | 9 (1%)         | 12 (1%)           |
| other MAC                   | 4 (1%)           | 116 (12%)      | 120 (8%)          |
| other RIC                   | 7 (1%)           | 79 (8%)        | 86 (6%)           |
| <b>Conditioning regimen</b> |                  |                |                   |
| FluBu                       | 183 (38%)        | 154 (16%)      | 337 (23%)         |
| FluMel                      | 28 (6%)          | 0 (0%)         | 28 (2%)           |
| FluTBI                      | 85 (17%)         | 63 (6%)        | 148 (10%)         |
| FluTreo                     | 7 (1%)           | 27 (3%)        | 34 (2%)           |
| TBI based MAC               | 173 (36%)        | 535 (55%)      | 708 (48%)         |
| other                       | 11 (2%)          | 195 (20%)      | 206 (14%)         |

**Supplemental Table 2.** Neutrophil engraftment

|                         |           | Neutrophil Engraftment |                 |                 |                  |
|-------------------------|-----------|------------------------|-----------------|-----------------|------------------|
|                         |           | N                      | 28 Days (95%CI) | HR (95%CI)*     | P* value         |
| Donor type              | MUD       | 974                    | 0.88(0.86,0.90) | Reference       | 0.24             |
|                         | Haplo     | 487                    | 0.86(0.83,0.89) | 1.08(0.95,1.24) |                  |
| Recipient age, years    | <30       | 579                    | 0.87(0.84,0.90) | Reference       | 0.22             |
|                         | 30-39     | 281                    | 0.88(0.83,0.91) | 0.94(0.82,1.09) |                  |
|                         | 40-54     | 350                    | 0.88(0.84,0.91) | 0.90(0.79,1.03) |                  |
|                         | ≥55       | 251                    | 0.86(0.82,0.90) | 0.84(0.70,1.00) |                  |
| KPS†                    | 90-100    | 978                    | 0.89(0.87,0.91) | Reference       | <b>0.047</b>     |
|                         | ≤80       | 388                    | 0.83(0.79,0.87) | 0.88(0.78,1.00) |                  |
| ALL subtype             | B-ALL     | 1044                   | 0.88(0.86,0.90) | Reference       | 0.44             |
|                         | T-ALL     | 322                    | 0.87(0.82,0.90) | 1.05(0.91,1.22) |                  |
|                         | Other     | 95                     | 0.85(0.76,0.91) | 0.90(0.72,1.13) |                  |
| Months from dx to HCT   | ≤6        | 398                    | 0.90(0.86,0.92) | Reference       | 0.98             |
|                         | >6-12     | 510                    | 0.87(0.84,0.90) | 1.01(0.89,1.16) |                  |
|                         | >12       | 553                    | 0.86(0.83,0.89) | 1.01(0.84,1.21) |                  |
| HCTCI†                  | 0         | 147                    | 0.90(0.84,0.94) | Reference       | 0.96             |
|                         | 1-2       | 92                     | 0.90(0.82,0.95) | 1.03(0.75,1.42) |                  |
|                         | >2        | 94                     | 0.94(0.86,0.97) | 1.04(0.79,1.38) |                  |
| Donor age, years†       | <30       | 342                    | 0.90(0.86,0.93) | Reference       | 0.50             |
|                         | 30-49     | 443                    | 0.88(0.85,0.91) | 0.95(0.82,1.10) |                  |
|                         | ≥50       | 127                    | 0.88(0.81,0.93) | 1.06(0.88,1.28) |                  |
| F donor to M recipient† | No        | 1172                   | 0.87(0.85,0.89) | Reference       | <b>0.020</b>     |
|                         | Yes       | 262                    | 0.88(0.83,0.91) | 1.18(1.03,1.36) |                  |
| CMV serostatus†         | D+/R+     | 581                    | 0.87(0.84,0.89) | Reference       | 0.15             |
|                         | D+/R-     | 130                    | 0.92(0.86,0.96) | 1.13(0.96,1.33) |                  |
|                         | D-/R+     | 366                    | 0.89(0.85,0.92) | 1.08(0.94,1.23) |                  |
|                         | D-/R-     | 318                    | 0.87(0.83,0.90) | 0.93(0.81,1.07) |                  |
| Stem cell source        | PB        | 1056                   | 0.90(0.88,0.92) | Reference       | <b>&lt;0.001</b> |
|                         | BM        | 405                    | 0.81(0.77,0.84) | 0.61(0.55,0.69) |                  |
| Transplant period       | 2005-2012 | 695                    | 0.86(0.83,0.89) | Reference       | <b>0.024</b>     |
|                         | 2013-2018 | 766                    | 0.89(0.86,0.91) | 1.13(1.02,1.26) |                  |

\*Based on multivariable proportional subdistribution hazards model for competing risks adjusted for KPS, F donor to M recipient, stem cell source, and transplant period, and stratified by matching variables: sex, cytogenetic risk, Ph status, disease stage, and conditioning intensity. The robust sandwich covariance matrix estimate was used to adjust for within center correlation.

†Patients who had missing values were included in the model when the variable as covariates, but were excluded when the variable as predictor of interest

**Supplemental Table 3.** Survival outcomes and Neutrophil engraftment subgroup analysis

|           |       | N   | OS              |                 |      | RFS             |                 |      | Neutrophil engraftment |                 |              |
|-----------|-------|-----|-----------------|-----------------|------|-----------------|-----------------|------|------------------------|-----------------|--------------|
|           |       |     | 3 Year (95%CI)  | HR (95%CI)*     | P*   | 3 Year (95%CI)  | HR (95%CI)* ‡   | P*   | 28 Days (95%CI)        | HR (95%CI)* ‡   | P*           |
| MAC†      | MUD   | 716 | 0.51(0.47,0.55) | Reference       | 0.56 | 0.46(0.42,0.49) | Reference       | 0.87 | 0.88(0.86,0.91)        | Reference       | 0.11         |
|           | Haplo | 358 | 0.44(0.38,0.50) | 1.07(0.86,1.33) |      | 0.41(0.36,0.47) | 1.02(0.83,1.25) |      | 0.87(0.83,0.90)        | 1.14(0.97,1.34) |              |
| RIC       | MUD   | 258 | 0.42(0.35,0.48) | Reference       | 0.60 | 0.31(0.25,0.38) | Reference       | 0.34 | 0.88(0.83,0.91)        | Reference       | 0.47         |
|           | Haplo | 129 | 0.43(0.33,0.53) | 0.91(0.64,1.29) |      | 0.31(0.22,0.41) | 0.88(0.68,1.14) |      | 0.84(0.77,0.90)        | 0.92(0.74,1.15) |              |
| CR1       | MUD   | 512 | 0.59(0.54,0.63) | Reference       | 0.91 | 0.53(0.49,0.58) | Reference       | 0.99 | 0.90(0.87,0.92)        | Reference       | 0.079        |
|           | Haplo | 256 | 0.57(0.49,0.64) | 1.02(0.74,1.40) |      | 0.51(0.43,0.57) | 1.00(0.75,1.33) |      | 0.91(0.86,0.94)        | 1.17(0.98,1.40) |              |
| Ph+       | MUD   | 234 | 0.57(0.50,0.63) | Reference       | 0.74 | 0.46(0.39,0.53) | Reference       | 0.68 | 0.90(0.85,0.93)        | Reference       | 0.58         |
|           | Haplo | 117 | 0.53(0.41,0.63) | 1.07(0.72,1.60) |      | 0.50(0.39,0.59) | 0.92(0.62,1.37) |      | 0.86(0.79,0.91)        | 1.08(0.83,1.39) |              |
| Ph-       | MUD   | 740 | 0.46(0.42,0.49) | Reference       | 0.62 | 0.41(0.37,0.44) | Reference       | 0.47 | 0.88(0.85,0.90)        | Reference       | 0.38         |
|           | Haplo | 370 | 0.41(0.35,0.46) | 1.05(0.86,1.30) |      | 0.36(0.30,0.41) | 1.07(0.89,1.28) |      | 0.86(0.82,0.89)        | 1.07(0.92,1.24) |              |
| PBSC      | MUD   | 806 | 0.49(0.45,0.53) | Reference       | 0.27 | 0.42(0.39,0.46) | Reference       | 0.46 | 0.89(0.87,0.91)        | Reference       | 0.77         |
|           | Haplo | 250 | 0.43(0.36,0.51) | 1.18(0.88,1.58) |      | 0.39(0.32,0.46) | 1.11(0.85,1.44) |      | 0.92(0.88,0.95)        | 1.02(0.88,1.18) |              |
| BM        | MUD   | 168 | 0.44(0.36,0.52) | Reference       | 0.32 | 0.40(0.32,0.48) | Reference       | 0.41 | 0.83(0.76,0.88)        | Reference       | <b>0.038</b> |
|           | Haplo | 237 | 0.43(0.36,0.51) | 0.86(0.64,1.15) |      | 0.39(0.32,0.46) | 0.89(0.66,1.19) |      | 0.80(0.74,0.84)        | 1.27(1.01,1.59) |              |
| 2013-2018 | MUD   | 365 | 0.48(0.41,0.54) | Reference       | 0.77 | 0.38(0.32,0.44) | Reference       | 0.52 | 0.91(0.88,0.94)        | Reference       | 0.59         |
|           | Haplo | 401 | 0.45(0.39,0.51) | 1.04(0.82,1.30) |      | 0.41(0.35,0.46) | 0.94(0.76,1.15) |      | 0.86(0.83,0.89)        | 1.04(0.90,1.21) |              |
| Ph+ B-ALL | MUD   | 232 | 0.57(0.50,0.64) | Reference       | 0.38 | 0.47(0.40,0.53) | Reference       | 0.89 | 0.90(0.85,0.93)        | Reference       | 0.85         |
|           | Haplo | 99  | 0.51(0.38,0.63) | 1.21(0.79,1.86) |      | 0.47(0.35,0.58) | 1.03(0.68,1.56) |      | 0.85(0.76,0.91)        | 1.03(0.79,1.34) |              |
| Ph- B-ALL | MUD   | 467 | 0.46(0.41,0.51) | Reference       | 0.64 | 0.42(0.37,0.46) | Reference       | 0.35 | 0.88(0.85,0.91)        | Reference       | 0.13         |
|           | Haplo | 246 | 0.39(0.32,0.46) | 1.06(0.83,1.36) |      | 0.36(0.29,0.43) | 1.11(0.89,1.38) |      | 0.87(0.82,0.91)        | 1.15(0.96,1.37) |              |
| T-ALL     | MUD   | 209 | 0.47(0.40,0.54) | Reference       | 0.49 | 0.40(0.32,0.47) | Reference       | 0.58 | 0.89(0.84,0.93)        | Reference       | 0.75         |
|           | Haplo | 113 | 0.44(0.34,0.54) | 1.13(0.80,1.59) |      | 0.36(0.27,0.45) | 1.10(0.79,1.52) |      | 0.81(0.73,0.87)        | 0.96(0.73,1.25) |              |

\*Based on multivariable Cox regression model adjusted for covariates, and stratified by matching variables: sex, cytogenetic risk, Ph status, and disease stage. The robust sandwich covariance matrix estimate was used to adjust for within center correlation.

† Adjusted for TBI-based conditioning regimen too.

**Supplemental Table 4.** Relapse and non-relapse mortality subgroup analysis

|           |       | N   | Relapse         |                 |              |                 | NRM             |       |  |
|-----------|-------|-----|-----------------|-----------------|--------------|-----------------|-----------------|-------|--|
|           |       |     | 3 Years (95%CI) | HR (95%CI)*     | P*           | 3 Years (95%CI) | HR (95%CI)*     | P*    |  |
| MAC       | MUD   | 716 | 0.31(0.28,0.35) | Reference       | 0.53         | 0.23(0.20,0.26) | Reference       | 0.32  |  |
|           | Haplo | 358 | 0.35(0.29,0.40) | 0.91(0.67,1.22) |              | 0.24(0.19,0.29) | 1.17(0.86,1.59) |       |  |
| RIC       | MUD   | 258 | 0.42(0.36,0.49) | Reference       | 0.24         | 0.26(0.21,0.32) | Reference       | 0.86  |  |
|           | Haplo | 129 | 0.42(0.32,0.52) | 0.79(0.53,1.18) |              | 0.26(0.18,0.35) | 1.04(0.67,1.61) |       |  |
| CR1       | MUD   | 512 | 0.23(0.19,0.27) | Reference       | 0.27         | 0.24(0.20,0.28) | Reference       | 0.31  |  |
|           | Haplo | 256 | 0.27(0.21,0.33) | 1.20(0.87,1.67) |              | 0.23(0.17,0.29) | 0.83(0.58,1.18) |       |  |
| Ph+       | MUD   | 234 | 0.28(0.22,0.34) | Reference       | 0.32         | 0.26(0.20,0.32) | Reference       | 0.59  |  |
|           | Haplo | 117 | 0.24(0.16,0.33) | 0.78(0.48,1.27) |              | 0.26(0.18,0.35) | 1.13(0.73,1.74) |       |  |
| Ph-       | MUD   | 740 | 0.36(0.32,0.40) | Reference       | 0.72         | 0.23(0.20,0.27) | Reference       | 0.43  |  |
|           | Haplo | 370 | 0.41(0.35,0.46) | 1.05(0.81,1.35) |              | 0.24(0.19,0.28) | 1.13(0.83,1.55) |       |  |
| PBSC      | MUD   | 806 | 0.34(0.31,0.38) | Reference       | 0.50         | 0.23(0.20,0.26) | Reference       | 0.42  |  |
|           | Haplo | 250 | 0.36(0.29,0.42) | 0.91(0.68,1.20) |              | 0.25(0.20,0.31) | 1.16(0.81,1.65) |       |  |
| BM        | MUD   | 168 | 0.33(0.26,0.41) | Reference       | 0.68         | 0.27(0.20,0.34) | Reference       | 0.93  |  |
|           | Haplo | 237 | 0.38(0.31,0.44) | 1.08(0.74,1.59) |              | 0.24(0.18,0.29) | 1.02(0.63,1.67) |       |  |
| 2013-2018 | MUD   | 365 | 0.42(0.36,0.48) | Reference       | <b>0.018</b> | 0.20(0.15,0.24) | Reference       | 0.070 |  |
|           | Haplo | 401 | 0.34(0.29,0.39) | 0.75(0.59,0.95) |              | 0.25(0.21,0.30) | 1.37(0.97,1.92) |       |  |
| Ph+ B-ALL | MUD   | 232 | 0.28(0.22,0.34) | Reference       | 0.56         | 0.26(0.20,0.32) | Reference       | 0.64  |  |
|           | Haplo | 99  | 0.26(0.16,0.36) | 0.86(0.51,1.44) |              | 0.27(0.18,0.37) | 1.12(0.70,1.81) |       |  |
| Ph- B-ALL | MUD   | 467 | 0.35(0.30,0.39) | Reference       | 0.67         | 0.23(0.20,0.27) | Reference       | 0.83  |  |
|           | Haplo | 246 | 0.39(0.33,0.46) | 1.06(0.81,1.39) |              | 0.25(0.19,0.31) | 1.04(0.74,1.46) |       |  |
| T-ALL     | MUD   | 209 | 0.38(0.31,0.45) | Reference       | 0.59         | 0.23(0.17,0.29) | Reference       | 0.58  |  |
|           | Haplo | 113 | 0.41(0.31,0.50) | 1.12(0.75,1.68) |              | 0.23(0.16,0.32) | 0.86(0.50,1.47) |       |  |

\*Based on multivariable proportional subdistribution hazards model for competing risks adjusting covariates, and stratified by matching variables: sex, cytogenetic risk, Ph status, and disease stage. The robust sandwich covariance matrix estimate was used to adjust for within center correlation.

**Supplemental Table 5a. Acute GvHD subset analysis**

|            |       | N   | Grade II-IV aGVHD |                 |              | Grade III-IV aGVHD |                 |              |
|------------|-------|-----|-------------------|-----------------|--------------|--------------------|-----------------|--------------|
|            |       |     | 100 days (95%CI)  | HR (95%CI)      | P            | 100 days (95%CI)   | HR (95%CI)      | P            |
| MAC        | MUD   | 716 | 0.34(0.31,0.38)   | Reference       | 0.46         | 0.13(0.10,0.15)    | Reference       | 0.27         |
|            | Haplo | 358 | 0.33(0.28,0.38)   | 1.09(0.87,1.36) |              | 0.14(0.10,0.18)    | 1.23(0.85,1.76) |              |
| RIC        | MUD   | 258 | 0.30(0.24,0.35)   | Reference       | 0.062        | 0.10(0.06,0.14)    | Reference       | <b>0.030</b> |
|            | Haplo | 129 | 0.31(0.23,0.40)   | 1.45(0.98,2.15) |              | 0.13(0.08,0.19)    | 2.19(1.08,4.44) |              |
| CR1        | MUD   | 512 | 0.34(0.30,0.39)   | Reference       | 0.34         | 0.12(0.10,0.15)    | Reference       | 0.46         |
|            | Haplo | 256 | 0.34(0.28,0.40)   | 1.14(0.87,1.50) |              | 0.12(0.08,0.16)    | 1.19(0.75,1.88) |              |
| Ph+        | MUD   | 234 | 0.37(0.31,0.43)   | Reference       | 0.87         | 0.14(0.10,0.19)    | Reference       | 0.51         |
|            | Haplo | 117 | 0.41(0.32,0.50)   | 1.03(0.72,1.48) |              | 0.18(0.11,0.26)    | 1.21(0.69,2.13) |              |
| Ph-        | MUD   | 740 | 0.32(0.28,0.35)   | Reference       | 0.29         | 0.11(0.09,0.14)    | Reference       | 0.14         |
|            | Haplo | 370 | 0.30(0.25,0.34)   | 1.14(0.90,1.44) |              | 0.12(0.09,0.16)    | 1.34(0.91,1.98) |              |
| PBSC       | MUD   | 806 | 0.34(0.31,0.38)   | Reference       | 0.11         | 0.12(0.10,0.15)    | Reference       | <b>0.041</b> |
|            | Haplo | 250 | 0.39(0.33,0.45)   | 1.20(0.96,1.50) |              | 0.16(0.12,0.21)    | 1.49(1.02,2.18) |              |
| BM         | MUD   | 168 | 0.28(0.21,0.35)   | Reference       | 0.90         | 0.10(0.06,0.15)    | Reference       | 0.77         |
|            | Haplo | 237 | 0.25(0.20,0.31)   | 0.98(0.64,1.48) |              | 0.11(0.07,0.15)    | 1.11(0.56,2.16) |              |
| 2013-2018  | MUD   | 365 | 0.32(0.27,0.37)   | Reference       | 0.062        | 0.12(0.09,0.15)    | Reference       | 0.16         |
|            | Haplo | 401 | 0.35(0.30,0.39)   | 1.28(0.99,1.65) |              | 0.15(0.11,0.18)    | 1.32(0.90,1.94) |              |
| Ph+ B-ALL  | MUD   | 232 | 0.37(0.31,0.43)   | Reference       | 0.61         | 0.14(0.10,0.19)    | Reference       | 0.30         |
|            | Haplo | 99  | 0.39(0.29,0.49)   | 1.10(0.76,1.61) |              | 0.18(0.11,0.27)    | 1.35(0.76,2.40) |              |
| Ph- B-ALL  | MUD   | 467 | 0.29(0.25,0.34)   | Reference       | <b>0.034</b> | 0.11(0.08,0.14)    | Reference       | 0.30         |
|            | Haplo | 246 | 0.34(0.28,0.40)   | 1.37(1.02,1.82) |              | 0.13(0.09,0.18)    | 1.27(0.80,2.02) |              |
| T-ALL      | MUD   | 209 | 0.37(0.30,0.43)   | Reference       | 0.15         | 0.11(0.07,0.16)    | Reference       | 0.92         |
|            | Haplo | 113 | 0.21(0.14,0.29)   | 0.65(0.36,1.17) |              | 0.09(0.05,0.16)    | 0.96(0.47,1.97) |              |
| F to M HCT | MUD   | 131 | 0.38(0.29,0.46)   | Reference       | <b>0.018</b> | 0.12(0.07,0.18)    | Reference       | 0.53         |
|            | Haplo | 131 | 0.30(0.22,0.38)   | 0.61(0.41,0.92) |              | 0.11(0.06,0.17)    | 0.80(0.40,1.60) |              |

\*Based on multivariable proportional subdistribution hazards model for competing risks adjusting time from ALL diagnosis to transplant, HCT CI, donor age, female donor to male recipient, and stem cell source, and stratified by matching variables: sex, cytogenetic risk, Ph status, and disease stage in MAC and RIC subgroups. The robust sandwich covariance matrix estimate was used to adjust for within center correlation.

**Table 5b.** Chronic GvHD subset analysis

|            |       | N   | Any cGVHD       |                 |      | Extensive cGVHD |                 |      |
|------------|-------|-----|-----------------|-----------------|------|-----------------|-----------------|------|
|            |       |     | 3-yr (95%CI)    | HR (95%CI)      | P*   | 3-yr (95%CI)    | HR (95%CI)      | P*   |
| MAC        | MUD   | 716 | 0.31(0.28,0.35) | Reference       | 0.58 | 0.12(0.09,0.14) | Reference       | 0.76 |
|            | Haplo | 358 | 0.29(0.24,0.34) | 1.09(0.81,1.47) |      | 0.09(0.06,0.12) | 1.08(0.65,1.79) |      |
| RIC        | MUD   | 258 | 0.29(0.23,0.35) | Reference       | 0.86 | 0.15(0.11,0.20) | Reference       | 0.32 |
|            | Haplo | 129 | 0.24(0.17,0.32) | 0.96(0.63,1.47) |      | 0.11(0.06,0.17) | 0.73(0.40,1.34) |      |
| CR1        | MUD   | 512 | 0.36(0.31,0.40) | Reference       | 0.68 | 0.15(0.12,0.18) | Reference       | 0.89 |
|            | Haplo | 256 | 0.32(0.26,0.38) | 1.07(0.77,1.48) |      | 0.10(0.07,0.14) | 0.96(0.56,1.64) |      |
| Ph+        | MUD   | 234 | 0.37(0.31,0.44) | Reference       | 0.63 | 0.14(0.10,0.19) | Reference       | 0.77 |
|            | Haplo | 117 | 0.34(0.25,0.43) | 1.11(0.72,1.73) |      | 0.12(0.07,0.19) | 1.12(0.54,2.32) |      |
| Ph-        | MUD   | 740 | 0.28(0.25,0.32) | Reference       | 0.69 | 0.12(0.10,0.15) | Reference       | 0.61 |
|            | Haplo | 370 | 0.26(0.21,0.30) | 1.06(0.79,1.42) |      | 0.09(0.06,0.12) | 0.89(0.57,1.39) |      |
| PBSC       | MUD   | 806 | 0.30(0.27,0.34) | Reference       | 0.48 | 0.12(0.10,0.15) | Reference       | 0.74 |
|            | Haplo | 250 | 0.29(0.23,0.35) | 1.11(0.82,1.51) |      | 0.12(0.08,0.16) | 1.08(0.68,1.71) |      |
| BM         | MUD   | 168 | 0.30(0.23,0.38) | Reference       | 0.89 | 0.12(0.08,0.18) | Reference       | 1.00 |
|            | Haplo | 237 | 0.26(0.21,0.32) | 0.97(0.66,1.44) |      | 0.07(0.04,0.11) | 1.00(0.41,2.43) |      |
| 2013-2018  | MUD   | 365 | 0.28(0.23,0.33) | Reference       | 0.86 | 0.09(0.06,0.13) | Reference       | 0.57 |
|            | Haplo | 401 | 0.26(0.22,0.31) | 1.03(0.77,1.37) |      | 0.08(0.06,0.12) | 1.16(0.69,1.97) |      |
| Ph+ B-ALL  | MUD   | 232 | 0.37(0.31,0.44) | Reference       | 0.69 | 0.14(0.10,0.19) | Reference       | 0.44 |
|            | Haplo | 99  | 0.36(0.26,0.46) | 1.10(0.68,1.78) |      | 0.11(0.06,0.19) | 0.76(0.38,1.53) |      |
| Ph- B-ALL  | MUD   | 467 | 0.28(0.24,0.33) | Reference       | 0.94 | 0.13(0.10,0.16) | Reference       | 0.93 |
|            | Haplo | 246 | 0.26(0.21,0.32) | 1.01(0.73,1.41) |      | 0.10(0.06,0.14) | 1.03(0.58,1.81) |      |
| T-ALL      | MUD   | 209 | 0.29(0.23,0.36) | Reference       | 0.71 | 0.11(0.07,0.16) | Reference       | 0.60 |
|            | Haplo | 113 | 0.24(0.17,0.33) | 1.10(0.67,1.81) |      | 0.08(0.04,0.14) | 0.78(0.31,1.96) |      |
| F to M HCT | MUD   | 131 | 0.26(0.19,0.35) | Reference       | 0.62 | 0.08(0.04,0.14) | Reference       | 0.65 |
|            | Haplo | 131 | 0.31(0.23,0.40) | 1.12(0.71,1.78) |      | 0.12(0.07,0.18) | 1.21(0.54,2.69) |      |

\*Based on multivariable proportional subdistribution hazards model for competing risks adjusting covariates, and stratified by matching variables: sex, cytogenetic risk, Ph status, and disease stage. The robust sandwich covariance matrix estimate was used to adjust for within center correlation.
